# Supplementary material
Source: publisher figshare collection journal article supplement (https://gsapubs.figshare.com/ndownloader/files/22411923)
Supplement: Supplementary file 1 [file 22411923]

sandstones are interpreted to be calcareous turbidite deposits (see Horton and Schmitt, 1996). Overall, the assemblage of ungraded and graded matrix- and clast-supported conglomerates, interbedded with horizontally stratified sandstones and granule conglomerates and massive sandstones and mudstones, represents deposition in a subaqueous or subaerial fan-delta system, formed when an alluvial fan meets a standing body of water (see Nemeč and Steel, 1988). Deposition was dominated by subaqueous debris-flows, interbedded turbidites, wave-influenced, shallow water sediments, and hemipelagic deposits (see Horton and Schmitt, 1996).

### Structural Interpretation

We interpret these strata to be a conglomerate and sandstone intrasalt inclusion (Fig. 11). An intrasalt inclusion, also called a stringer, is a non-evaporite, more competent lithology originally deposited within the layered evaporite sequence, which was subsequently broken up and deformed within the salt

during salt wall growth (e.g., Strozyk et al., 2012; Jackson et al., 2014). Salt inclusions can reveal information about depositional environments during the time of evaporite deposition and the internal dynamics of the salt diapir (e.g., Jackson et al., 2014; Alsop et al., 2016; Hudson et al., 2017) as well as the regional sediment routing during salt deposition (Fig. 16; also see below discussion).

### EVOLUTION OF THE SINBAD VALLEY SALT WALL

Proximal to the Uncompahgre Uplift, a prograding sediment wedge of the upper Pennsylvanian Honaker Trail Formation through the Permian Cutler Group drove lateral salt withdrawal and initiated diapirism in the northeastern part of the basin (Trudgill, 2011; Figs. 17, S1, S2 [footnote 1]). However, the Honaker Trail and lower Cutler strata are conformable and do not show significant growth, thus passive diapirism had not yet initiated. The Sinbad Valley salt wall, given its proximity to the Uncompahgre Uplift, initiated during the late Pennsylvanian. At this point along the Uncompahgre Uplift, the Honaker

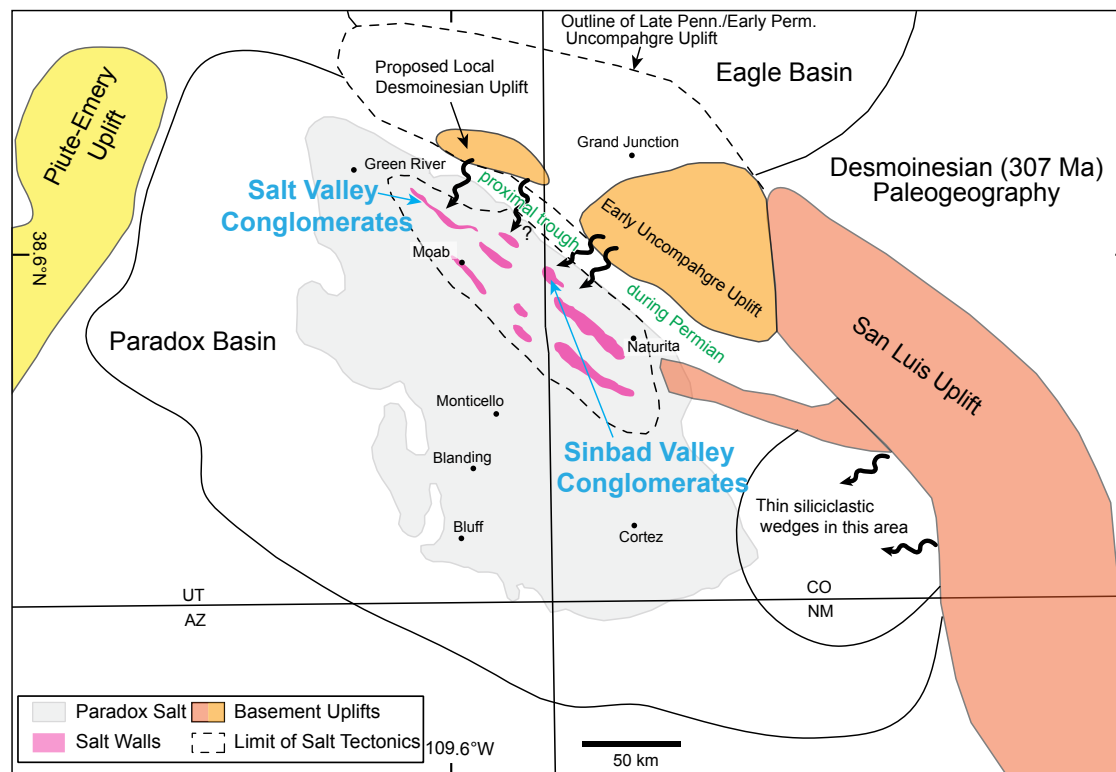

Figure 16. Desmoinesian paleogeography, illustrating proposed source area for Sinbad Valley, southwest USA, conglomerates. Figure modified after Rasmussen (2013). Penn. – Pennsylvania; Perm. – Permian; UT – Utah; CO – Colorado; AZ – Arizona; NM – New Mexico. To view Figure 16’s “labels” layer in the PDF version of this paper, open the PDF in Adobe Acrobat or Adobe Reader. To view the layer while reading the full-text version of the paper, click <http://doi.org/10.1130/GES02089.f16> to download a PDF of the figure.

To view Figure 16’s “labels” layer in the PDF version of this paper, open the PDF in Adobe Acrobat or Adobe Reader. To view the layer while reading the full-text version of the paper, click <http://doi.org/10.1130/GES02089.f16> to download a PDF of the figure.

Labels  
Paleogeography
